# Supplementary material for: A hollow NaBiF4:Tb nanoscintillator with ultra-weak afterglow for high-resolution X-ray imaging
Source: Royal Society of Chemistry journal article supplement (doi:10.1039/d3cc03821a), 2023-01-01
Supplement: d3cc03821a1.pdf [file d3cc03821a1.pdf]

## Supporting Information

### Hollow NaBiF<sub>4</sub>:Tb nanoscintillator with ultra-weak afterglow for high-resolution X-ray imaging

Huirong Zou, Minghao Yi, Shiqing Xu, Lei Lei\*

Key Laboratory of Rare Earth Optoelectronic Materials and Devices of Zhejiang Province, College of Optical and Electronic technology, China Jiliang University, Hangzhou 310018, China.

Email:leilei@cjlu.edu.cn

#### Experimental Procedures

##### Materials

Ethylene glycol (EG, 98%), Bi(NO<sub>3</sub>)<sub>3</sub>·5H<sub>2</sub>O (99.99%), Tb(NO<sub>3</sub>)<sub>3</sub>·5H<sub>2</sub>O (99.9%) were purchased from Aladdin. NaCl (99.9%) and NH<sub>4</sub>F (98%) were obtained from Macklin. All the reagents listed above were used without further purification. The frozen bullfrog was purchased from a shop.

##### Synthesis

**Synthesis of NaBiF<sub>4</sub>:15Tb NSs.** Preparation process of NaBiF<sub>4</sub>:15Tb NSs is described as follows. First, Bi(NO<sub>3</sub>)<sub>3</sub>·5H<sub>2</sub>O (0.85 mmol), Tb(NO<sub>3</sub>)<sub>3</sub>·5H<sub>2</sub>O (0.15 mmol) and NaCl (2 mmol) into 10 mL EG as the stock solution A. NH<sub>4</sub>F (24 mmol) was dissolved in 20 mL EG to form stock solution B. Second, solution B were added sequentially to the reaction system and vigorously stirred for 10 min. After stirring uniformly, the mixed solution was transferred to a centrifuge tubes (50 mL). Next, the samples were washed four times with anhydrous ethanol, collected through centrifugation. Finally, the products were dried at room temperature.

**Synthesis of NaBiF<sub>4</sub>: 15Tb film.** Polymethyl methacrylate (PMMA, 100 mg) and 1 mL toluene were mixed, which then were stirred to form a transparent solution. 30 mg NaBiF<sub>4</sub> NSs was added into the above PMMA toluene solution, which then was stirred for more than 3 h to generate uniform paste product without agglomerate. The resultant product was transferred into a designed mold, which then volatilized at room temperature for 12 h until the film was formed.

##### Characterizations

X-ray diffraction (XRD) analysis was carried out by a powder diffractometer (Bruker D8

Advance) with a Cu-K $\alpha$  ( $\lambda = 1.5405 \text{ \AA}$ ) radiation. The morphology and size of the products were characterized by a field emission transmission electron microscopy (TEM, FEI Tecnai G<sup>2</sup> F20) equipped with an energy dispersive X-ray spectroscopy (EDS, Aztec X-Max 80T). XEOL spectra were measured by a spectrometer (OmniFluo960 X-ray, Zolix, China) with an X-ray tube (target material: W, voltage 50 kV, tube current 200  $\mu\text{A}$ ) and a photon counter (DCS210PC-9S). X-ray imaging was performed by a miniature X-ray tube (target material: Au, voltage: 30 kV, tube current: 200  $\mu\text{A}$ ) and cheap camera (Nikon D850, AF-S Micro-Nikkor 105 mm f/2.8G IF-ED).

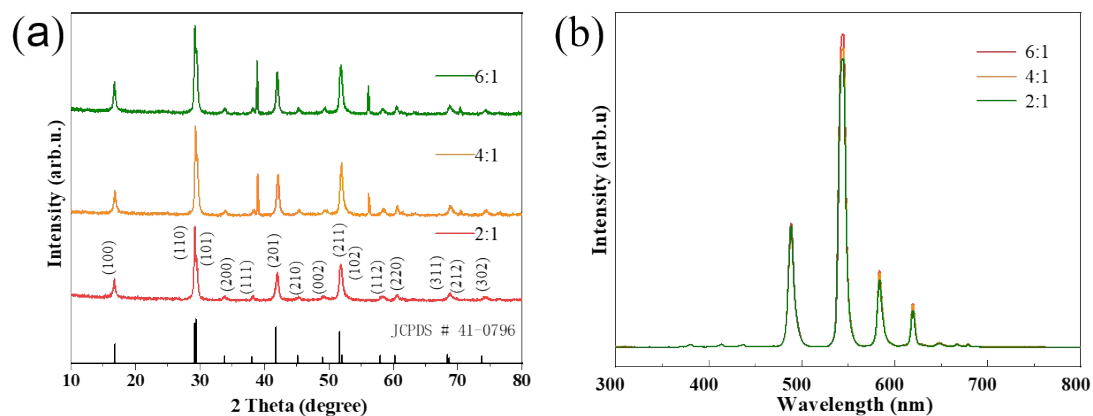

**Figure S1.** (a) XEOL spectra of the NaBiF<sub>4</sub>:Tb NSs with different Tb<sup>3+</sup> doping concentrations (5, 10, 15, 20 mol%) and (b) the corresponding integral intensity variations.

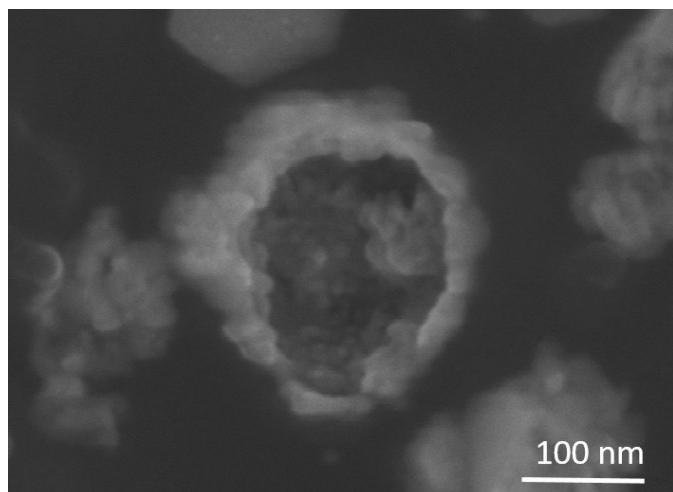

**Figure S2.** SEM image of the NaBiF<sub>4</sub>:15Tb NSs.

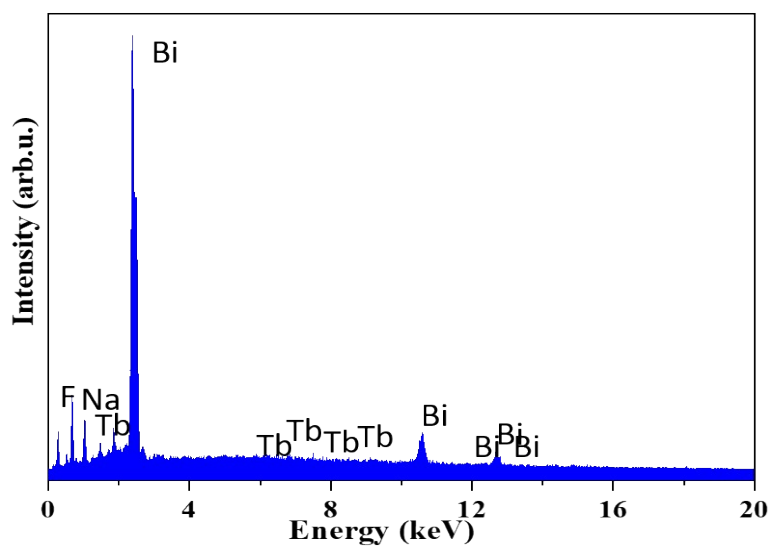

**Figure S3.** EDS spectra of the NaBiF<sub>4</sub>:15Tb NSs.

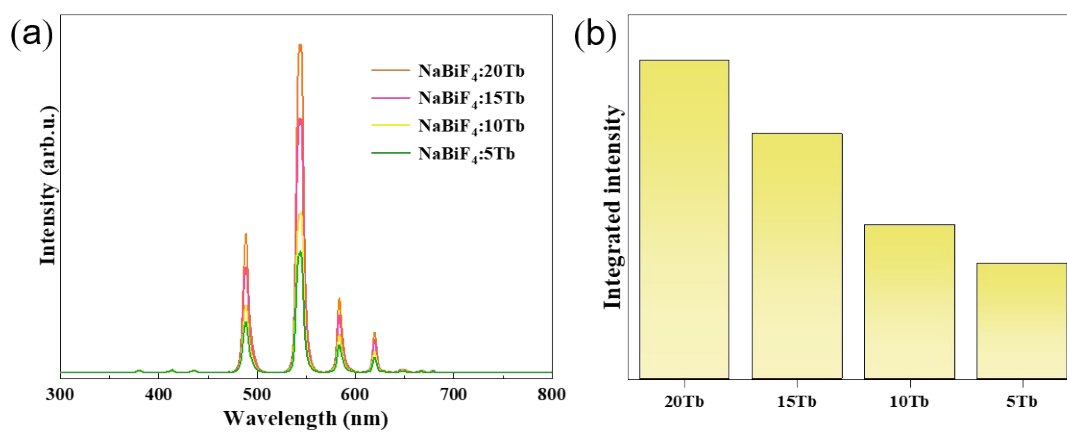

**Figure S4.** (a) XEOL spectra of the NaBiF<sub>4</sub>:Tb NSs with different Tb<sup>3+</sup> doping concentrations (5, 10, 15, 20 mol%) and (b) the corresponding integral intensity variations.

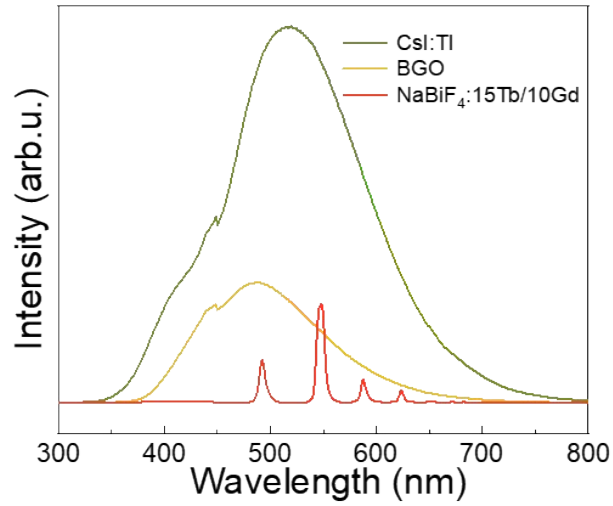

**Figure S5.** XEOL spectra of the NaBiF<sub>4</sub>:15Tb/10Gd NSs, commercial BGO and CsI: TI.

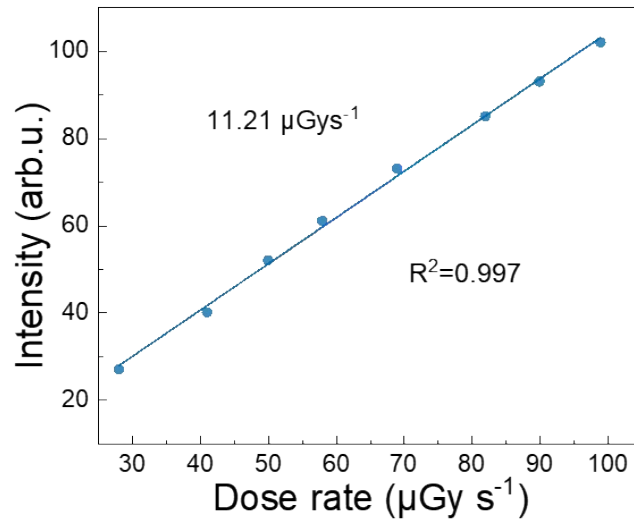

**Figure S6.** XEOL intensity of the NaBiF<sub>4</sub>:15Tb/10Gd NSs measured at low-dose rates. The detection limit is derived from the fitting curve when the SNR equals 3.

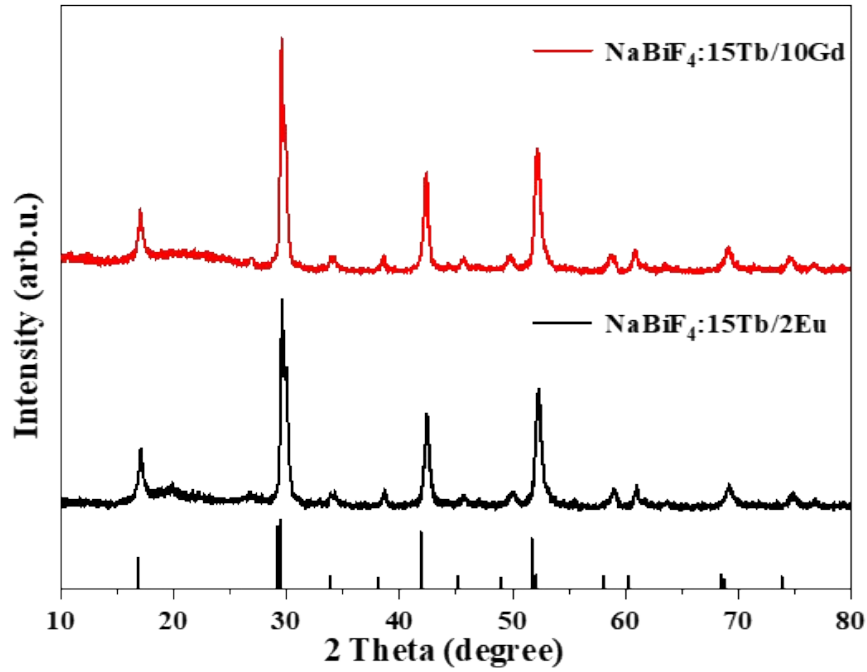

**Figure S7.** XRD pattern of the NaBiF<sub>4</sub>:15Tb/10Gd, NaBiF<sub>4</sub>:15Tb/2Eu NSs.

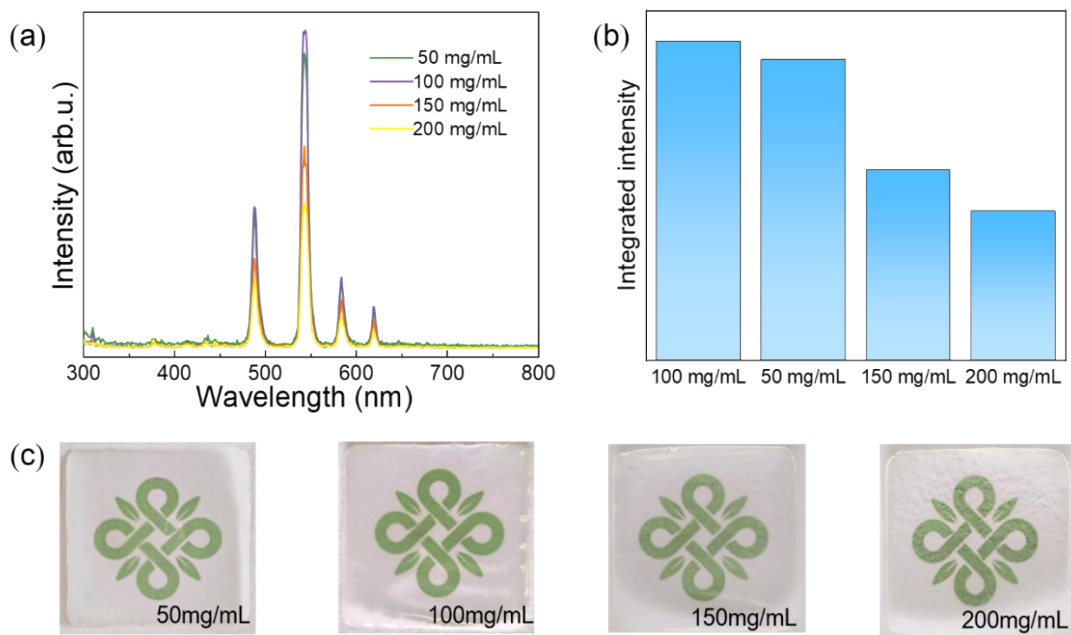

**Figure S8.** (a) XEOL diagram of the film after PMMA concentration regulation, and (b) the corresponding integral intensity variations. (c) Photographs of films doped with different PMMA concentrations.

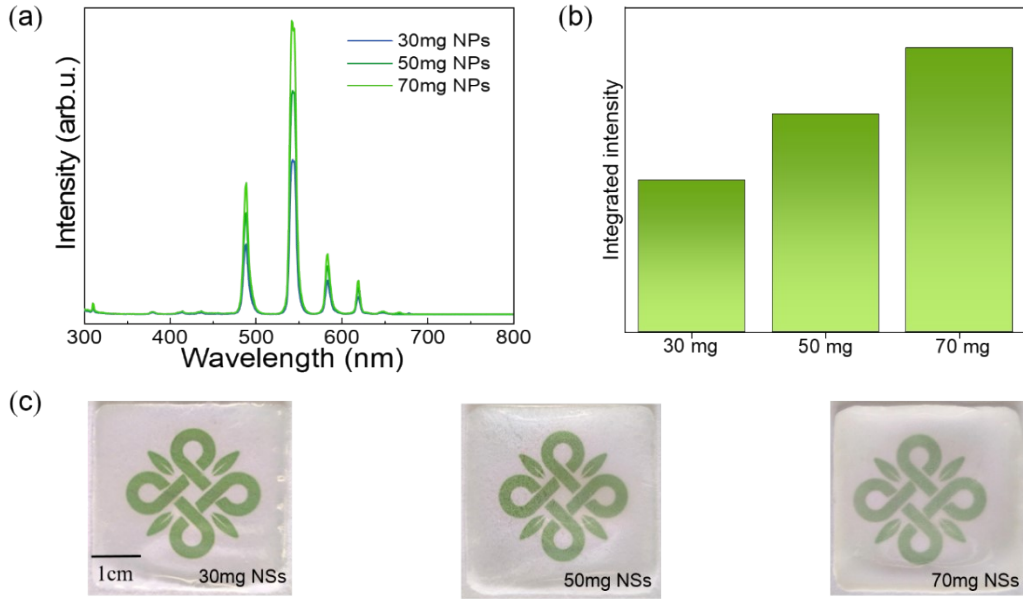

**Figure S9.** (a) XEOL diagram of the film with fixed PMMA concentration regulating the doping amount of NSs, and (b) the corresponding integral intensity variations. (c) Photographs of films doped with different NSs.

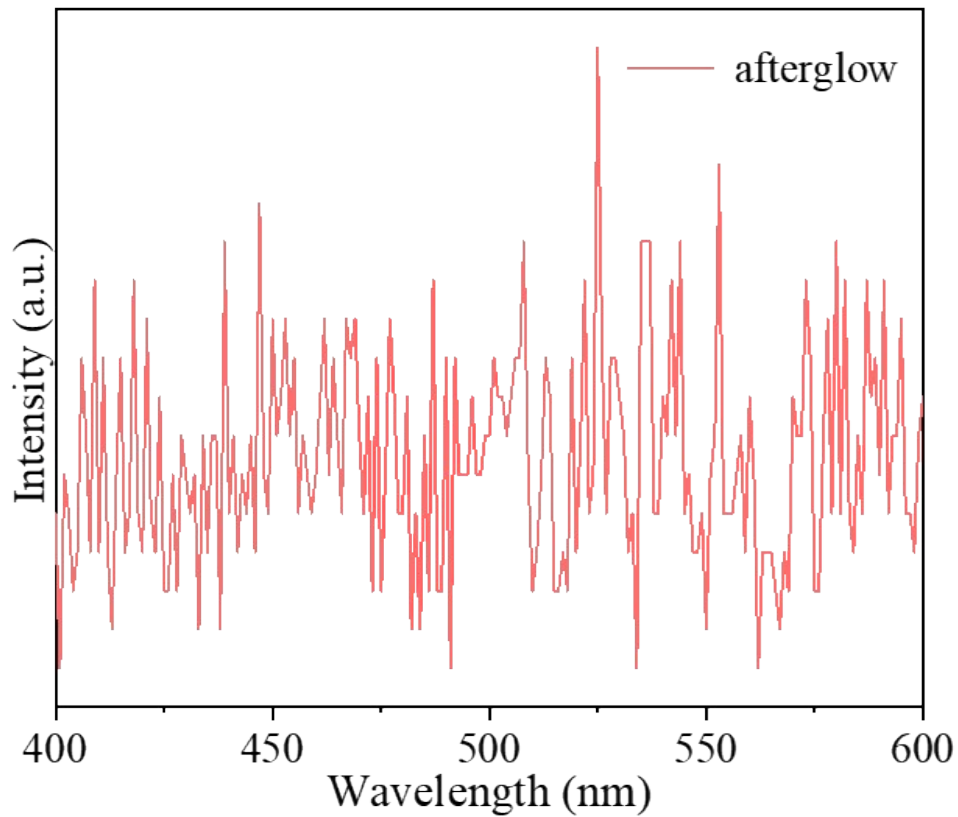

**Figure S10.** Afterglow spectrum of the NaBiF<sub>4</sub>:15Tb/10Gd NSs (12 W, 20 mins).

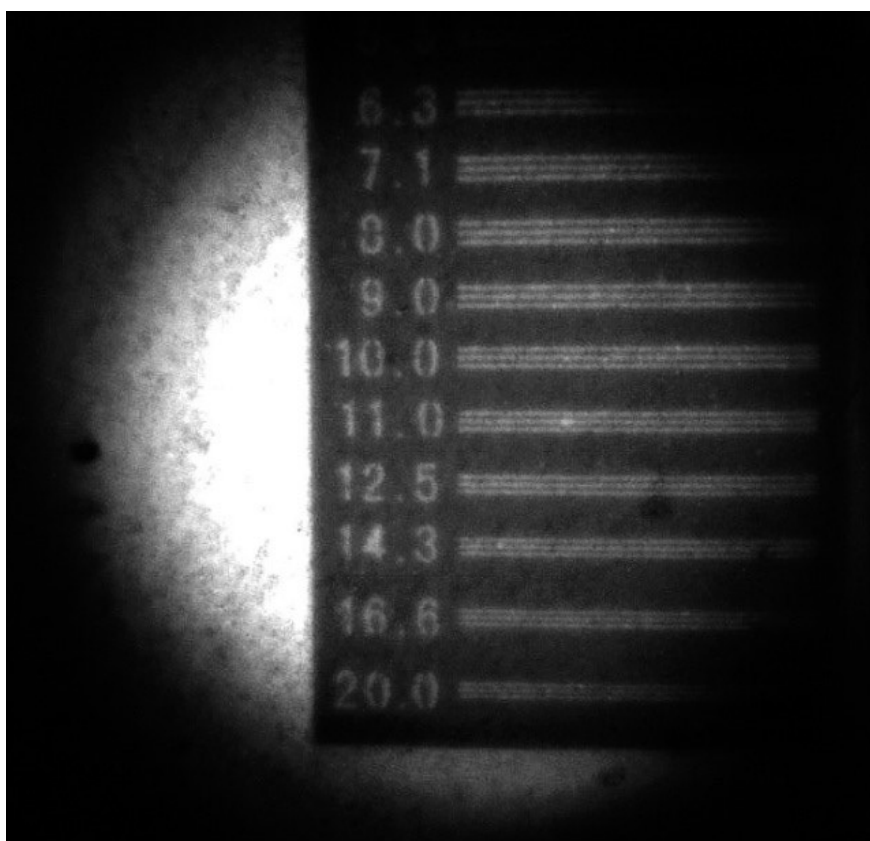

**Figure S11.** XEOL image of the standard X-ray resolution test pattern plate.
